# Supplementary material
Source: publisher figshare collection journal article supplement (https://tandf.figshare.com/articles/dataset/_/7347158)

**BT1**

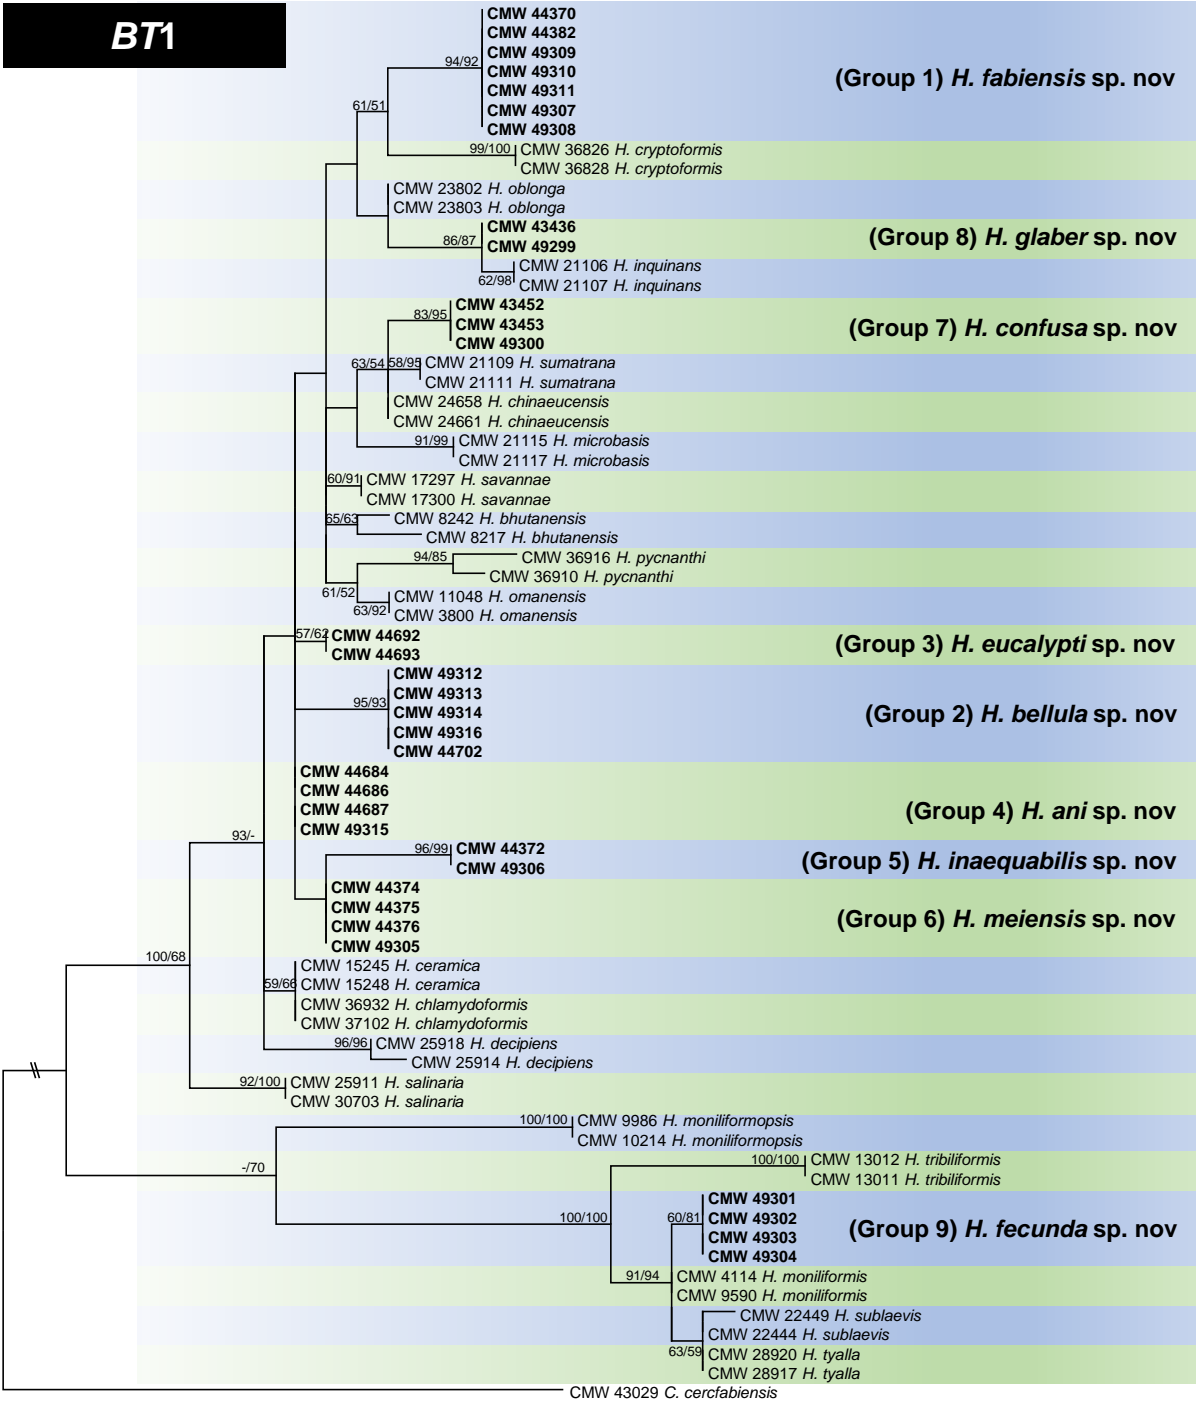

0.005

Supplement: Supplementary file 1 [file 1]

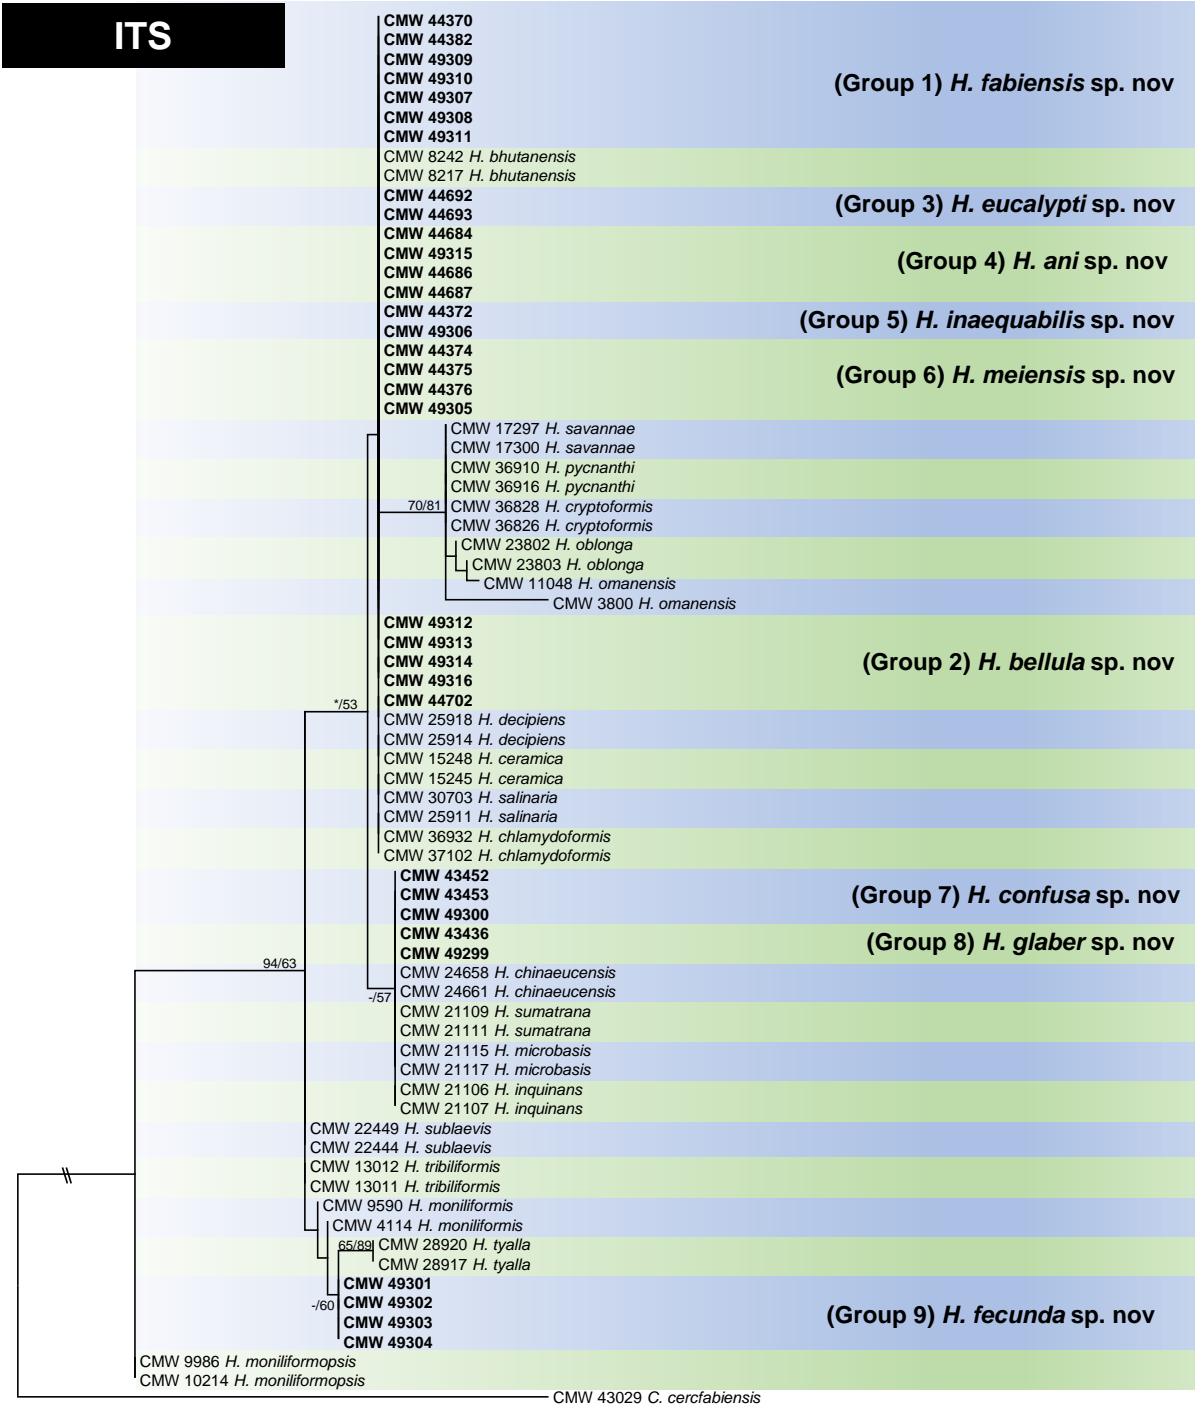

Supplement: Supplementary file 2 [file 1]

**TEF-1 $\alpha$**

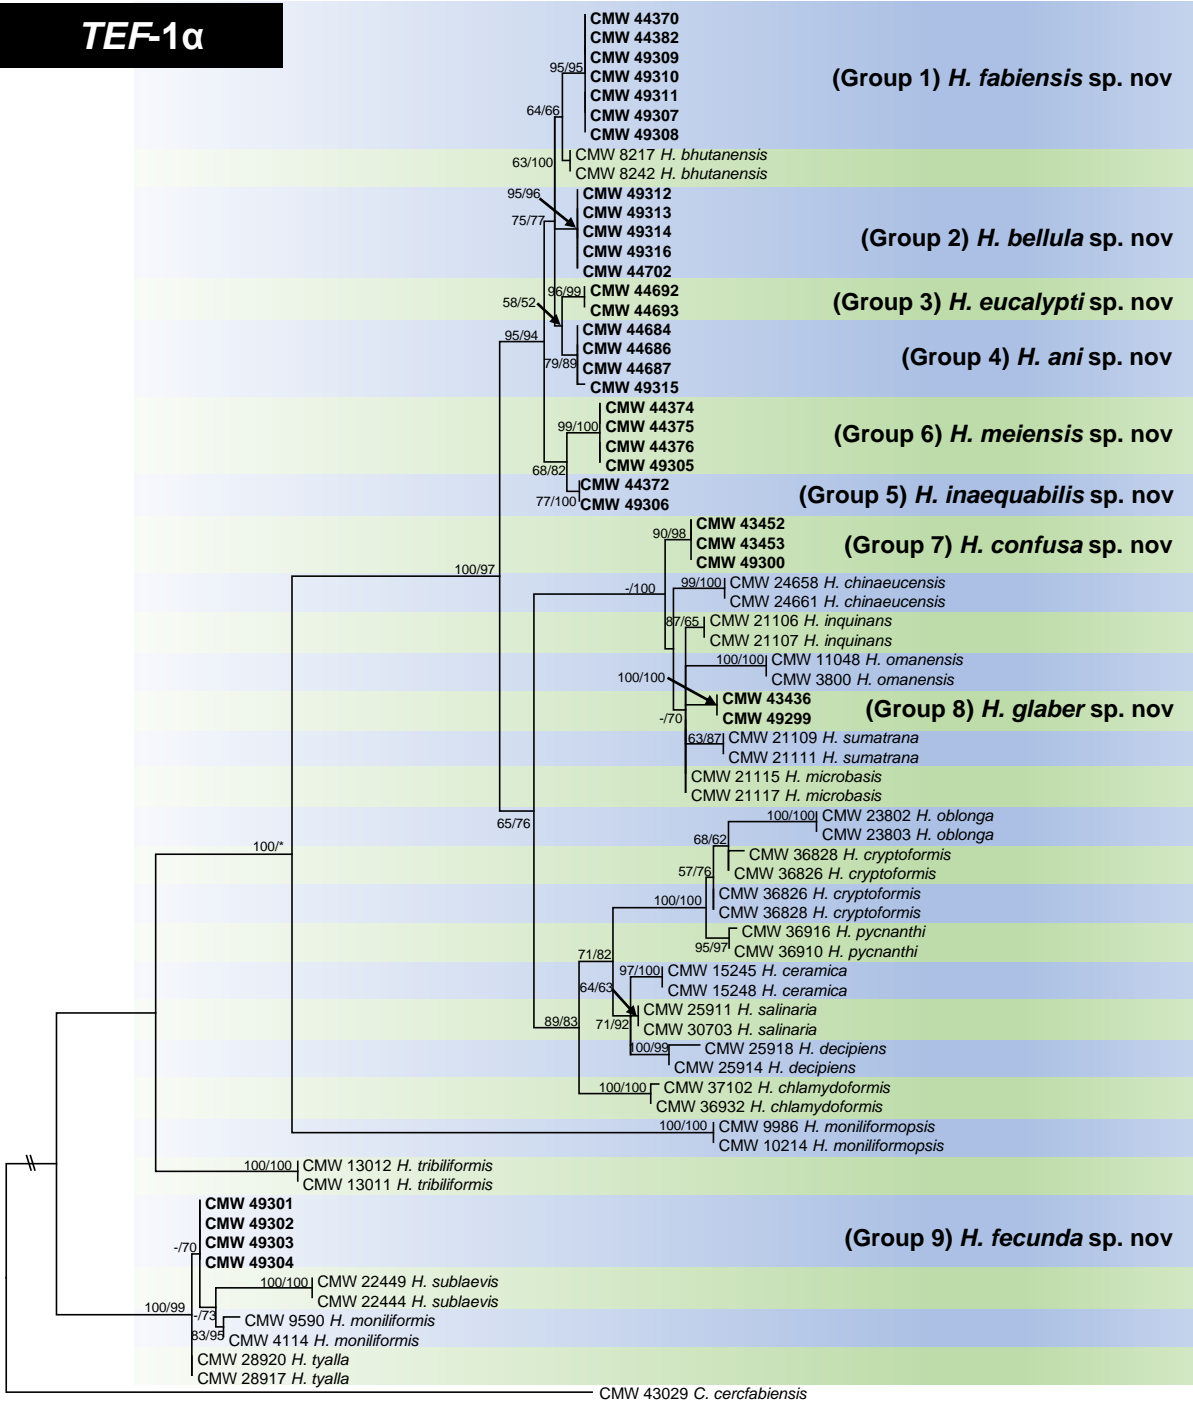

Supplement: Supplementary file 3 [file 1]
